# Supplementary material for: Magnesium complexes supported by pyrrolyl ligands: syntheses, characterizations, and catalytic activities towards the polymerization of ε-caprolactone
Source: Royal Society of Chemistry journal article supplement (doi:10.1039/c2ra01235a), 2012-01-01
Supplement: c2ra01235a.pdf [file c2ra01235a.pdf]

## Supporting Information

**Title:** Magnesium complexes supported by pyrrolyl ligands: synthesis, characterization, and catalytic activity toward the polymerization of  $\epsilon$ -caprolactone

**Authors:**

Miaoshui Lin, Wei Liu, Zhou Chen, Lijuan Yang, Hao Pei, Jian Wu ,  
Xiaoyu Wan, Tao Lei, Yahong Li

1.  $^1\text{H}$  and  $^{13}\text{C}$  NMR spectra for the complexes **1-5**.
2. Crystallography data for complexes **2-4**.

## 1. $^1\text{H}$ and $^{13}\text{C}$ NMR spectra for the complexes **1-5**.

### 1.1 $^1\text{H}$ and $^{13}\text{C}$ NMR spectra for $\text{Mg}(\text{L1})_2$ (**1**)

$^1\text{H}$  NMR (400 MHz,  $\text{CDCl}_3$ )  $\delta$  8.43 (s, 2H, N=CH), 7.93 (d, 2H,  $J = 4.7$  Hz, pyridyl-H), 7.56 (t, 2H,  $J = 7.5$  Hz, pyridyl-H), 7.21 (d, 2H,  $J = 7.8$  Hz, pyridyl-H), 6.99 – 6.91 (m, 2H, pyridyl-H), 6.81 (s, 2H, pyrrole-H), 6.69 (d,  $J = 3.0$  Hz, 2H, pyrrole-H), 6.11 (d,  $J = 1.8$  Hz, 2H, pyrrole-H), 5.01 (s, 4H,  $\text{NCH}_2$ ).  $^{13}\text{C}$  NMR (101 MHz,  $\text{CDCl}_3$ )  $\delta$  158.81, 158.48, 147.57, 138.34, 137.46, 136.14, 122.67, 122.00, 115.41, 110.27, 5.25.

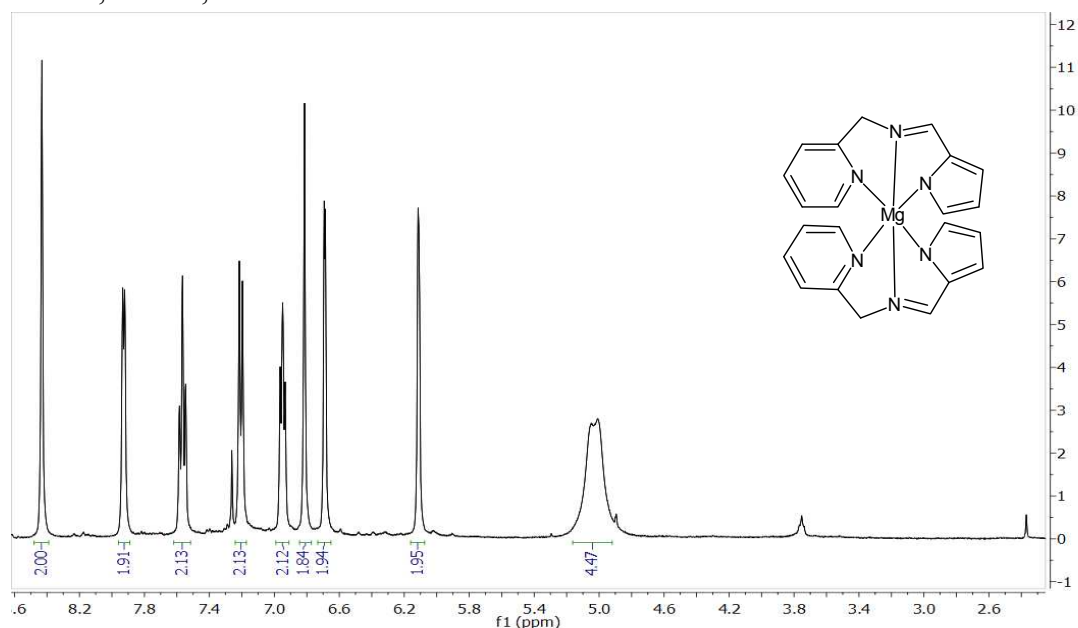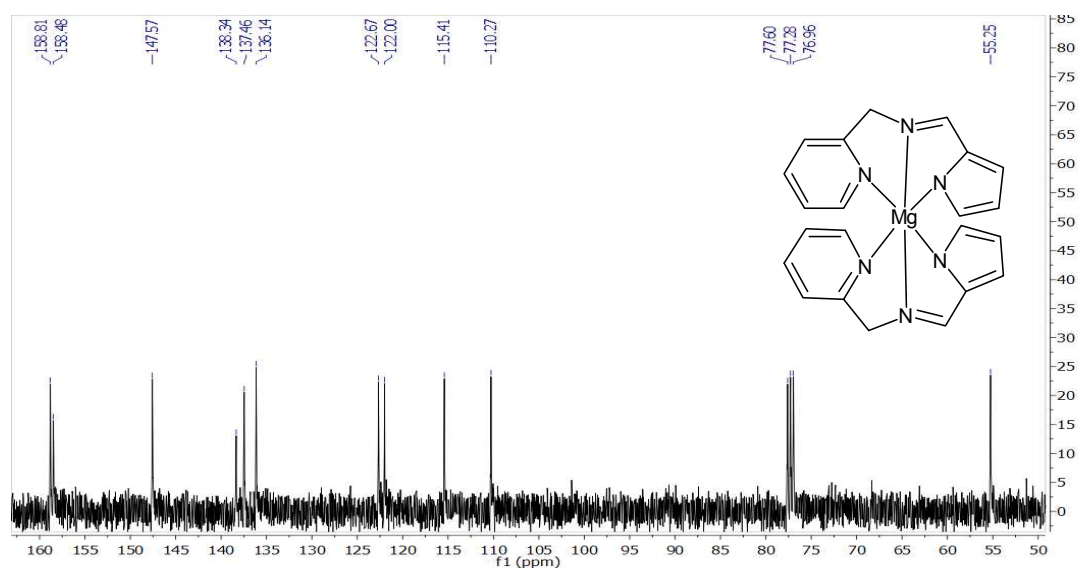

## 1.2 $^1\text{H}$ and $^{13}\text{C}$ NMR spectra for $\text{Mg}(\text{L}2)_2$ (**2**)

$^1\text{H}$  NMR (400 MHz,  $\text{CDCl}_3$ )  $\delta$  8.15 (s, 2H, N=CH), 7.99 (d, 2H,  $J = 4.4$  Hz, pyridyl-H), 7.53 (td,  $J = 7.6, 1.6$  Hz, 2H, pyridyl-H), 7.16 (d,  $J = 7.7$  Hz, 2H, pyridyl-H), 6.95 – 6.84 (m, 4H, pyridyl-H+ pyrrole-H), 6.55 (d,  $J = 2.8$  Hz, 2H, pyrrole-H), 6.15 – 6.04 (m, 2H, pyrrole-H), 4.14 – 4.02 (m, 4H,  $\text{CH}_2$ -pyridyl), 3.76 (s, 4H,  $\text{NCH}_2$ ).  $^{13}\text{C}$  NMR (101 MHz,  $\text{CDCl}_3$ )  $\delta$  159.68, 152.77, 149.36, 136.22, 130.00, 123.62, 122.46, 121.29, 114.78, 109.62, 60.25, 39.95.

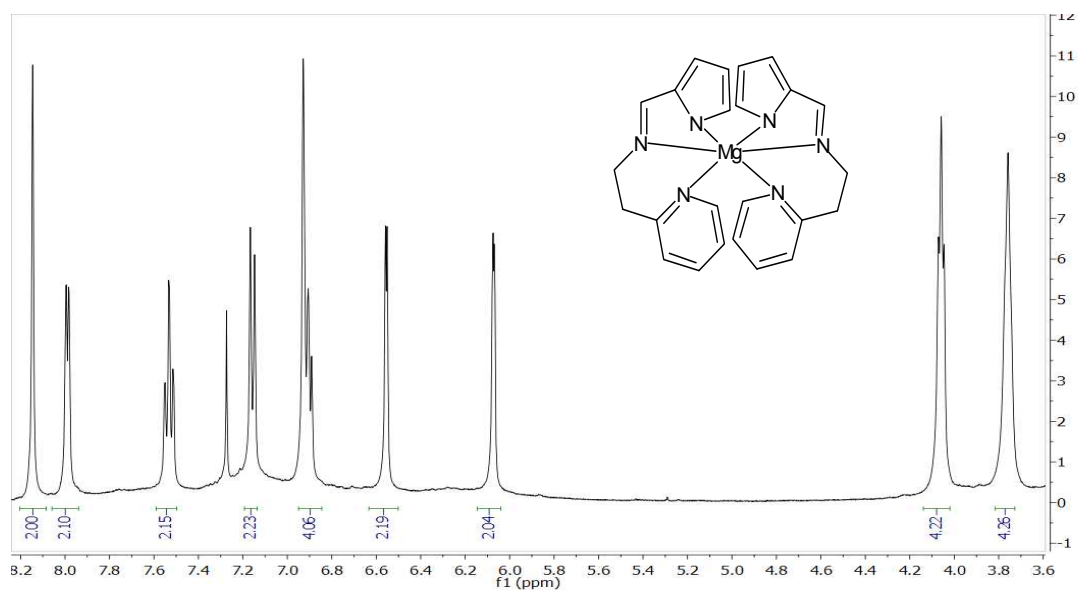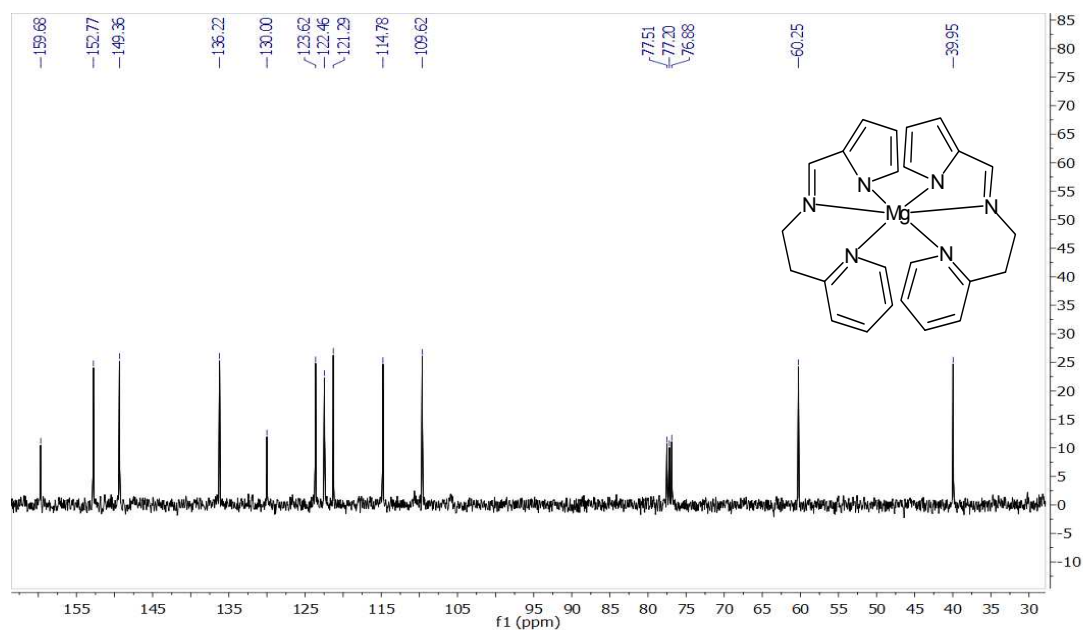

### 1.3 $^1\text{H}$ and $^{13}\text{C}$ NMR spectra for $\text{Mg}(\text{L3})_2(\text{THF})_2$ (**3**)

$^1\text{H}$  NMR (400 MHz,  $\text{CDCl}_3$ )  $\delta$  8.43 (s, 2H, N=CH), 7.36 (dd,  $J = 15.5$ , 8H, Ar-H), 7.19 (t,  $J = 7.0$  Hz, 2H, Ar-H), 6.87 (s, 2H, pyrrole-H), 6.78 (s, 2H, pyrrole-H), 6.27 (s, 2H, pyrrole-H), 3.77 (s, 8H,  $\text{CH}_2\text{O}$  of THF), 1.81 (s, 8H,  $\text{CH}_2$  of THF).  $^{13}\text{C}$  NMR (75 MHz,  $\text{CDCl}_3$ )  $\delta$  155.70, 149.40, 138.70, 138.40, 129.56, 125.08, 120.94, 120.13, 113.01, 69.22, 25.28.

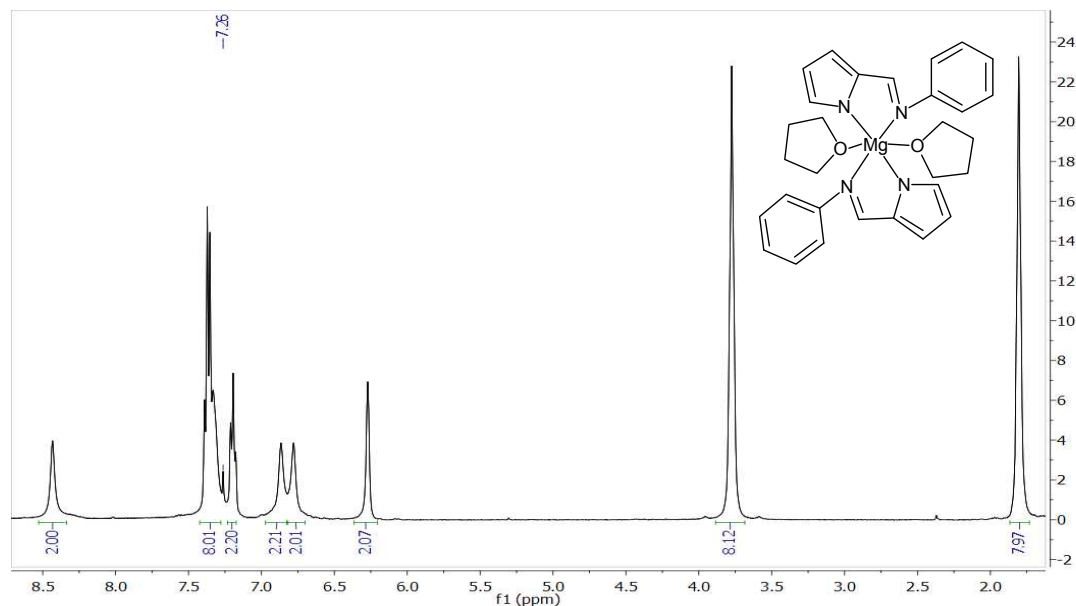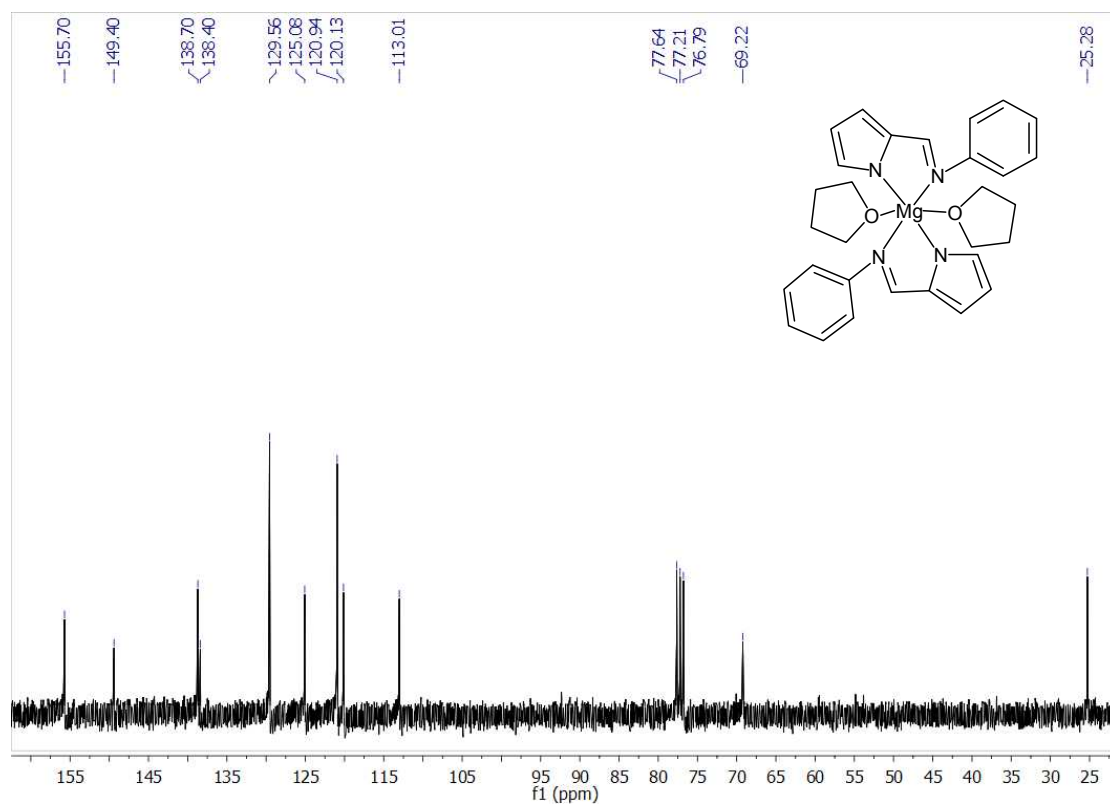

#### 1.4 $^1\text{H}$ and $^{13}\text{C}$ NMR spectra for $\text{Mg}(\text{L4})_2(\text{THF})_2$ (**4**)

$^1\text{H}$  NMR (400 MHz,  $\text{CDCl}_3$ )  $\delta$  8.24 (s, 2H, N=CH), 7.53 – 7.41 (m, 6H, Ar-H), 7.36 (d,  $J = 7.3$  Hz, 4H, Ar-H), 7.19 (s, 2H, pyrrole-H), 6.89 (s, 2H, pyrrole-H), 6.52 (d,  $J = 1.5$  Hz, 2H, pyrrole-H), 4.72 (s, 4H,  $\text{NCH}_2$ ), 3.70 (s, 8H,  $\text{CH}_2\text{O}$  of THF), 1.85 (s, 8H,  $\text{CH}_2$  of THF).  $^{13}\text{C}$  NMR (100 MHz,  $\text{CDCl}_3$ )  $\delta$  161.16, 139.60, 137.11, 135.08, 128.39, 128.28, 127.03, 116.19, 110.80, 68.39, 60.61, 25.24.

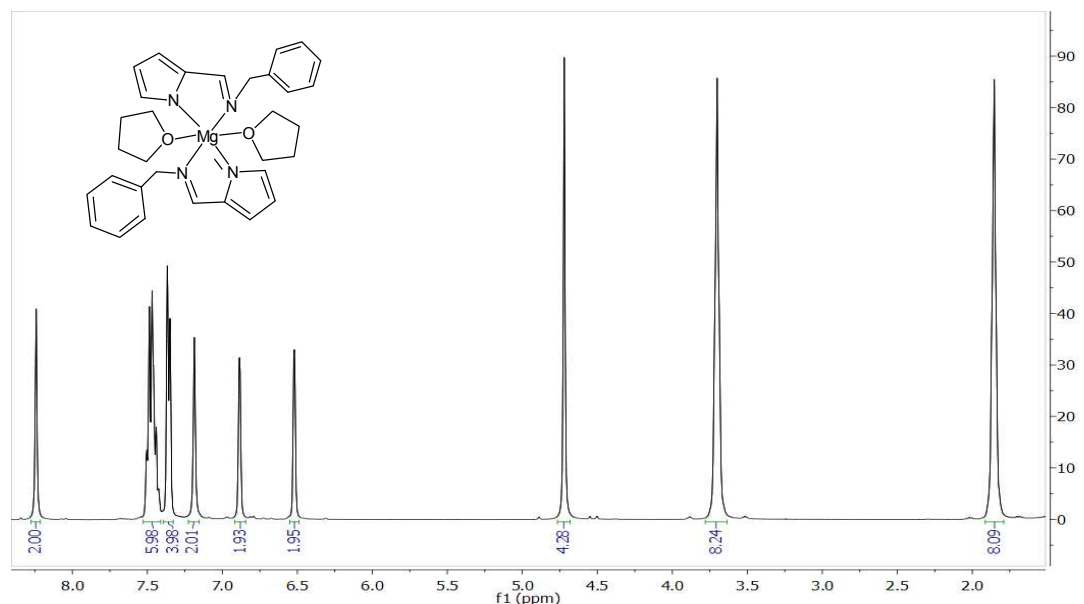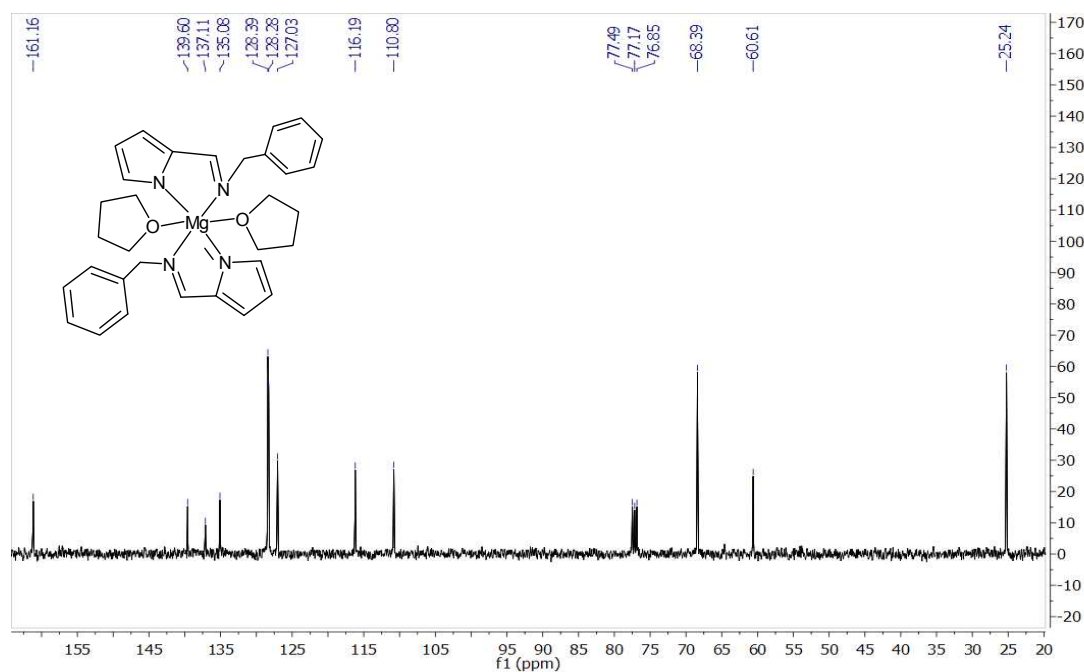

## 1.5 $^1\text{H}$ and $^{13}\text{C}$ NMR spectra for $\text{Mg}(\text{L5})_2(\text{THF})_2$ (**5**)

$^1\text{H}$  NMR (300 MHz,  $\text{CDCl}_3$ )  $\delta$  8.03 (s, 2H, N=CH), 7.37 -7.15(s, 8H, Ar-H), 7.15-7.05 (s, 4H, Ar-H+ pyrrole-H), 6.73 (s, 2H, pyrrole-H), 6.44 (s, 2H, pyrrole-H), 3.70 (s, 8H,  $\text{CH}_2\text{O}$  of THF), 3.60 (s, 4H,  $\text{CH}_2\text{-Ar}$ , 2.67 (s, 4H,  $\text{NCH}_2$ ), 1.85 (s, 8H,  $\text{CH}_2$  of THF).  $^{13}\text{C}$  NMR (75 MHz,  $\text{CDCl}_3$ )  $\delta$  160.41, 139.81, 137.27, 134.43, 129.09, 128.50, 126.21, 115.84, 110.84, 68.71, 59.71, 38.40, 25.50.

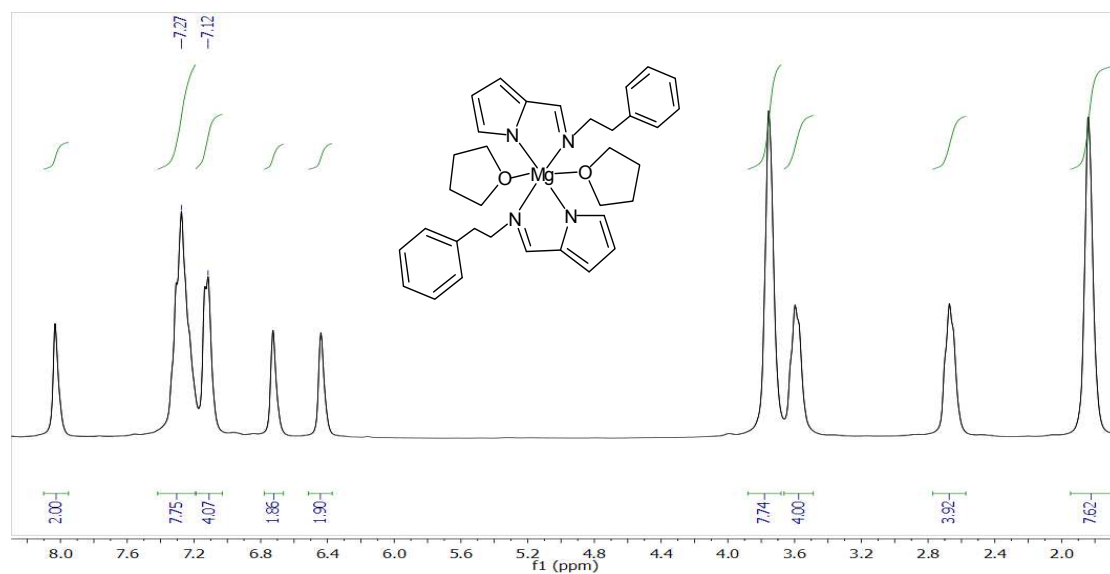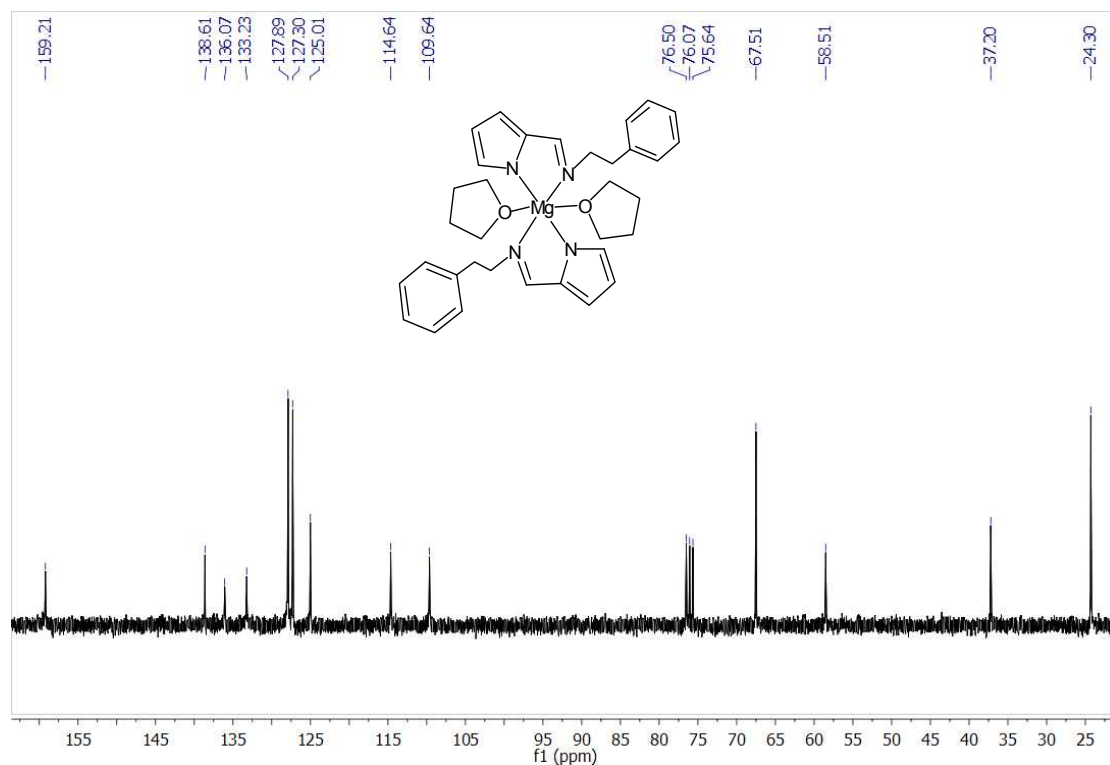

## 2. Crystallography data for complexes **2-4**.

### 2.1 Crystal data for **2-4**

|                                                                             | <b>2</b>                                                          | <b>3</b>                                                          | <b>4</b>                                                          |
|-----------------------------------------------------------------------------|-------------------------------------------------------------------|-------------------------------------------------------------------|-------------------------------------------------------------------|
| Formula <sup>a</sup>                                                        | C <sub>24</sub> H <sub>24</sub> MgN <sub>6</sub>                  | C <sub>30</sub> H <sub>34</sub> MgN <sub>4</sub> O <sub>2</sub>   | C <sub>32</sub> H <sub>38</sub> MgN <sub>4</sub> O <sub>2</sub>   |
| M / g mol <sup>-1</sup> <sup>a</sup>                                        | 420.80                                                            | 506.92                                                            | 534.97                                                            |
| Temperature/K                                                               | 293(2)                                                            | 293(2)                                                            | 293(2)                                                            |
| Wavelength <sup>b</sup> / Å                                                 | 0.71073                                                           | 0.71073                                                           | 0.71073                                                           |
| Crystal system                                                              | Monoclinic                                                        | Monoclinic                                                        | Triclinic                                                         |
| Space group                                                                 | <i>C</i> 2/ <i>c</i>                                              | <i>P</i> 2 <sub>1</sub> / <i>c</i>                                | <i>P</i> $\bar{1}$                                                |
| <i>a</i> / Å                                                                | 28.215(6)                                                         | 9.986(2)                                                          | 10.453(2)                                                         |
| <i>b</i> / Å                                                                | 16.504(3)                                                         | 14.269(3)                                                         | 11.456(2)                                                         |
| <i>c</i> / Å                                                                | 14.405(3)                                                         | 19.278(4)                                                         | 12.516(3)                                                         |
| <i>α</i> / °                                                                | 90                                                                | 90                                                                | 84.02(3)                                                          |
| <i>β</i> / °                                                                | 98.59(3)                                                          | 92.42(3)                                                          | 76.88(3)                                                          |
| <i>γ</i> / °                                                                | 90                                                                | 90                                                                | 89.43(3)                                                          |
| <i>V</i> / Å <sup>3</sup>                                                   | 6633(2)                                                           | 2744.5(10)                                                        | 1451.7(5)                                                         |
| <i>Z</i>                                                                    | 12                                                                | 4                                                                 | 2                                                                 |
| <i>ρ</i> / g cm <sup>-3</sup>                                               | 1.264                                                             | 1.227                                                             | 1.224                                                             |
| <i>F</i> (000)                                                              | 2664                                                              | 1080                                                              | 572                                                               |
| Crystal size/ mm <sup>3</sup>                                               | 0.40 x 0.30 x 0.15                                                | 0.23 x 0.21 x 0.19                                                | 0.25 x 0.20 x 0.17                                                |
| <i>θ</i> range/ °                                                           | 3.05 to 25.02°                                                    | 3.04 to 27.47°                                                    | 1.68 to 28.36°                                                    |
| Limiting indices                                                            | -29 ≤ <i>h</i> ≤ 33<br>-19 ≤ <i>k</i> ≤ 18<br>-17 ≤ <i>l</i> ≤ 16 | -12 ≤ <i>h</i> ≤ 12<br>-18 ≤ <i>k</i> ≤ 16<br>-25 ≤ <i>l</i> ≤ 20 | -13 ≤ <i>h</i> ≤ 13<br>-15 ≤ <i>k</i> ≤ 15<br>-16 ≤ <i>l</i> ≤ 15 |
| Reflections collected /<br>unique                                           | 16422 / 5828                                                      | 14835 / 6228                                                      | 26473 / 7247                                                      |
| Data / restraints /<br>parameters                                           | 5828 / 0 / 421                                                    | 6228 / 7 / 334                                                    | 6228 / 7 / 334                                                    |
| GOF                                                                         | 1.181                                                             | 1.157                                                             | 1.066                                                             |
| <i>R</i> <sub>1</sub> , <i>wR</i> <sub>2</sub> [ <i>I</i> > 2σ( <i>I</i> )] | <i>R</i> <sub>1</sub> = 0.0927                                    | <i>R</i> <sub>1</sub> = 0.0980                                    | <i>R</i> <sub>1</sub> = 0.0556                                    |

|                                               |                  |                  |                  |
|-----------------------------------------------|------------------|------------------|------------------|
|                                               | $wR_2 = 0.1372$  | $wR_2 = 0.2011$  | $wR_2 = 0.1497$  |
|                                               | $R_1 = 0.1359$   | $R_1 = 0.1504$   | $R_1 = 0.0685$   |
| $R_1^c, wR_2^{d,e}$ (all data)                | $wR_2 = 0.1537$  | $wR_2 = 0.2289$  | $wR_2 = 0.1597$  |
| Largest diff. peak and hole/ e Å <sup>3</sup> | 0.284 and -0.254 | 0.488 and -0.736 | 0.519 and -0.501 |

<sup>a</sup> Including solvate molecules. <sup>b</sup> Mo K $\alpha$  radiation. <sup>c</sup>  $R_1 = \Sigma(|F_o| - |F_c|) / \Sigma(|F_o|)$  for observed reflections. <sup>d</sup>  $w = 1 / [\sigma^2(F_o^2) + (aP)^2 + bP]$  and  $P = [\max(F_o^2, 0) + 2Fc^2] / 3$ . <sup>e</sup>  $wR_2 = \{\Sigma[w(F_o^2 - F_c^2)^2] / \Sigma[w(F_o^2)^2]\}^{1/2}$  for all data.

## 2.2 Bond angles and distances for complex 2

---

|              |          |
|--------------|----------|
| Mg(2)-N(7)   | 2.150(3) |
| Mg(2)-N(7)#1 | 2.150(3) |
| Mg(2)-N(8)   | 2.188(3) |
| Mg(2)-N(8)#1 | 2.188(3) |
| Mg(2)-N(9)#1 | 2.301(3) |
| Mg(2)-N(9)   | 2.301(3) |
| N(9)-C(24)   | 1.342(5) |
| N(9)-C(11)   | 1.355(4) |
| Mg(1)-N(6)   | 2.156(4) |
| Mg(1)-N(5)   | 2.162(3) |
| Mg(1)-N(3)   | 2.169(4) |
| Mg(1)-N(2)   | 2.176(3) |
| Mg(1)-N(1)   | 2.307(4) |
| Mg(1)-N(4)   | 2.320(4) |



|              |          |
|--------------|----------|
| N(7)-C(17)   | 1.341(5) |
| N(7)-C(20)   | 1.379(4) |
| N(6)-C(23)   | 1.352(5) |
| N(6)-C(19)   | 1.373(5) |
| N(8)-C(9)    | 1.281(5) |
| N(8)-C(13)   | 1.459(4) |
| N(2)-C(22)   | 1.292(5) |
| N(2)-C(25)   | 1.460(5) |
| N(5)-C(29)   | 1.282(5) |
| N(5)-C(33)   | 1.462(5) |
| N(1)-C(28)   | 1.349(4) |
| N(1)-C(31)   | 1.350(5) |
| N(4)-C(27)   | 1.345(5) |
| N(4)-C(35)   | 1.354(5) |
| C(9)-C(20)   | 1.424(5) |
| C(9)-H(9)    | 0.9300   |
| C(10)-C(28)  | 1.505(5) |
| C(10)-C(25)  | 1.516(6) |
| C(10)-H(10A) | 0.9700   |
| C(10)-H(10B) | 0.9700   |
| C(11)-C(15)  | 1.373(5) |
| C(11)-C(16)  | 1.504(5) |

|               |          |
|---------------|----------|
| C(12)-C(24)   | 1.370(6) |
| C(12)-C(38)   | 1.377(5) |
| C(12)-H(12)   | 0.9300   |
| C(13)-C(16)#1 | 1.527(5) |
| C(13)-H(13A)  | 0.9700   |
| C(13)-H(13B)  | 0.9700   |
| N(3)-C(40)    | 1.346(5) |
| N(3)-C(30)    | 1.385(5) |
| C(15)-C(38)   | 1.367(6) |
| C(15)-H(15)   | 0.9300   |
| C(16)-C(13)#1 | 1.527(5) |
| C(16)-H(16A)  | 0.9700   |
| C(16)-H(16B)  | 0.9700   |
| C(17)-C(34)   | 1.394(6) |
| C(17)-H(17)   | 0.9300   |
| C(18)-C(43)   | 1.370(6) |
| C(18)-C(28)   | 1.381(6) |
| C(18)-H(18)   | 0.9300   |
| C(19)-C(44)   | 1.384(6) |
| C(19)-C(29)   | 1.430(5) |
| C(20)-C(21)   | 1.384(5) |
| C(21)-C(34)   | 1.389(5) |

|              |          |
|--------------|----------|
| C(21)-H(21)  | 0.9300   |
| C(22)-C(30)  | 1.416(6) |
| C(22)-H(22)  | 0.9300   |
| C(23)-C(42)  | 1.389(6) |
| C(23)-H(23)  | 0.9300   |
| C(24)-H(24)  | 0.9300   |
| C(25)-H(25A) | 0.9700   |
| C(25)-H(25B) | 0.9700   |
| C(26)-C(31)  | 1.364(6) |
| C(26)-C(43)  | 1.369(5) |
| C(26)-H(26)  | 0.9300   |
| C(27)-C(41)  | 1.382(6) |
| C(27)-C(32)  | 1.504(6) |
| C(29)-H(29)  | 0.9300   |
| C(30)-C(36)  | 1.387(6) |
| C(31)-H(31)  | 0.9300   |
| C(32)-C(33)  | 1.515(6) |
| C(32)-H(32A) | 0.9700   |
| C(32)-H(32B) | 0.9700   |
| C(33)-H(33A) | 0.9700   |
| C(33)-H(33B) | 0.9700   |
| C(34)-H(34)  | 0.9300   |

|                   |            |
|-------------------|------------|
| C(35)-C(37)       | 1.367(6)   |
| C(35)-H(35)       | 0.9300     |
| C(36)-C(39)       | 1.378(6)   |
| C(36)-H(36)       | 0.9300     |
| C(37)-C(45)       | 1.377(6)   |
| C(37)-H(37)       | 0.9300     |
| C(38)-H(38)       | 0.9300     |
| C(39)-C(40)       | 1.399(6)   |
| C(39)-H(39)       | 0.9300     |
| C(40)-H(40)       | 0.9300     |
| C(41)-C(45)       | 1.375(7)   |
| C(41)-H(41)       | 0.9300     |
| C(42)-C(44)       | 1.389(6)   |
| C(42)-H(42)       | 0.9300     |
| C(43)-H(43)       | 0.9300     |
| C(44)-H(44)       | 0.9300     |
| C(45)-H(45)       | 0.9300     |
| N(7)-Mg(2)-N(7)#1 | 93.69(18)  |
| N(7)-Mg(2)-N(8)   | 77.67(11)  |
| N(7)#1-Mg(2)-N(8) | 105.72(12) |
| N(7)-Mg(2)-N(8)#1 | 105.72(12) |

|                     |            |
|---------------------|------------|
| N(7)#1-Mg(2)-N(8)#1 | 77.67(11)  |
| N(8)-Mg(2)-N(8)#1   | 175.18(19) |
| N(7)-Mg(2)-N(9)#1   | 160.01(10) |
| N(7)#1-Mg(2)-N(9)#1 | 92.52(12)  |
| N(8)-Mg(2)-N(9)#1   | 82.36(11)  |
| N(8)#1-Mg(2)-N(9)#1 | 94.16(11)  |
| N(7)-Mg(2)-N(9)     | 92.52(12)  |
| N(7)#1-Mg(2)-N(9)   | 160.01(10) |
| N(8)-Mg(2)-N(9)     | 94.16(11)  |
| N(8)#1-Mg(2)-N(9)   | 82.36(11)  |
| N(9)#1-Mg(2)-N(9)   | 88.04(17)  |
| C(24)-N(9)-C(11)    | 116.6(3)   |
| C(24)-N(9)-Mg(2)    | 118.3(2)   |
| C(11)-N(9)-Mg(2)    | 125.1(3)   |
| N(6)-Mg(1)-N(5)     | 77.90(13)  |
| N(6)-Mg(1)-N(3)     | 103.93(14) |
| N(5)-Mg(1)-N(3)     | 101.98(13) |
| N(6)-Mg(1)-N(2)     | 105.47(13) |
| N(5)-Mg(1)-N(2)     | 176.56(15) |
| N(3)-Mg(1)-N(2)     | 77.97(13)  |
| N(6)-Mg(1)-N(1)     | 93.27(13)  |
| N(5)-Mg(1)-N(1)     | 96.59(13)  |

|                  |            |
|------------------|------------|
| N(3)-Mg(1)-N(1)  | 156.89(14) |
| N(2)-Mg(1)-N(1)  | 82.67(13)  |
| N(6)-Mg(1)-N(4)  | 159.88(13) |
| N(5)-Mg(1)-N(4)  | 82.49(13)  |
| N(3)-Mg(1)-N(4)  | 84.44(13)  |
| N(2)-Mg(1)-N(4)  | 94.09(13)  |
| N(1)-Mg(1)-N(4)  | 84.47(12)  |
| C(17)-N(7)-C(20) | 105.2(3)   |
| C(17)-N(7)-Mg(2) | 143.0(3)   |
| C(20)-N(7)-Mg(2) | 111.4(2)   |
| C(23)-N(6)-C(19) | 104.9(4)   |
| C(23)-N(6)-Mg(1) | 144.0(3)   |
| C(19)-N(6)-Mg(1) | 111.0(3)   |
| C(9)-N(8)-C(13)  | 118.3(3)   |
| C(9)-N(8)-Mg(2)  | 112.5(2)   |
| C(13)-N(8)-Mg(2) | 128.1(2)   |
| C(22)-N(2)-C(25) | 117.8(3)   |
| C(22)-N(2)-Mg(1) | 112.0(3)   |
| C(25)-N(2)-Mg(1) | 130.2(3)   |
| C(29)-N(5)-C(33) | 119.2(3)   |
| C(29)-N(5)-Mg(1) | 112.9(3)   |
| C(33)-N(5)-Mg(1) | 127.6(3)   |

|                     |          |
|---------------------|----------|
| C(28)-N(1)-C(31)    | 116.7(3) |
| C(28)-N(1)-Mg(1)    | 124.9(3) |
| C(31)-N(1)-Mg(1)    | 117.8(3) |
| C(27)-N(4)-C(35)    | 116.9(4) |
| C(27)-N(4)-Mg(1)    | 125.0(3) |
| C(35)-N(4)-Mg(1)    | 116.7(3) |
| N(8)-C(9)-C(20)     | 120.2(3) |
| N(8)-C(9)-H(9)      | 119.9    |
| C(20)-C(9)-H(9)     | 119.9    |
| C(28)-C(10)-C(25)   | 113.8(4) |
| C(28)-C(10)-H(10A)  | 108.8    |
| C(25)-C(10)-H(10A)  | 108.8    |
| C(28)-C(10)-H(10B)  | 108.8    |
| C(25)-C(10)-H(10B)  | 108.8    |
| H(10A)-C(10)-H(10B) | 107.7    |
| N(9)-C(11)-C(15)    | 121.8(4) |
| N(9)-C(11)-C(16)    | 117.6(3) |
| C(15)-C(11)-C(16)   | 120.7(3) |
| C(24)-C(12)-C(38)   | 118.5(4) |
| C(24)-C(12)-H(12)   | 120.8    |
| C(38)-C(12)-H(12)   | 120.8    |
| N(8)-C(13)-C(16)#1  | 107.9(3) |

|                      |          |
|----------------------|----------|
| N(8)-C(13)-H(13A)    | 110.1    |
| C(16)#1-C(13)-H(13A) | 110.1    |
| N(8)-C(13)-H(13B)    | 110.1    |
| C(16)#1-C(13)-H(13B) | 110.1    |
| H(13A)-C(13)-H(13B)  | 108.4    |
| C(40)-N(3)-C(30)     | 104.7(3) |
| C(40)-N(3)-Mg(1)     | 144.1(3) |
| C(30)-N(3)-Mg(1)     | 110.0(3) |
| C(38)-C(15)-C(11)    | 120.6(4) |
| C(38)-C(15)-H(15)    | 119.7    |
| C(11)-C(15)-H(15)    | 119.7    |
| C(11)-C(16)-C(13)#1  | 113.1(3) |
| C(11)-C(16)-H(16A)   | 109.0    |
| C(13)#1-C(16)-H(16A) | 109.0    |
| C(11)-C(16)-H(16B)   | 109.0    |
| C(13)#1-C(16)-H(16B) | 109.0    |
| H(16A)-C(16)-H(16B)  | 107.8    |
| N(7)-C(17)-C(34)     | 111.8(4) |
| N(7)-C(17)-H(17)     | 124.1    |
| C(34)-C(17)-H(17)    | 124.1    |
| C(43)-C(18)-C(28)    | 119.7(4) |
| C(43)-C(18)-H(18)    | 120.1    |



|                    |          |
|--------------------|----------|
| C(28)-C(18)-H(18)  | 120.1    |
| N(6)-C(19)-C(44)   | 110.8(4) |
| N(6)-C(19)-C(29)   | 117.8(4) |
| C(44)-C(19)-C(29)  | 131.3(4) |
| N(7)-C(20)-C(21)   | 110.8(3) |
| N(7)-C(20)-C(9)    | 118.1(3) |
| C(21)-C(20)-C(9)   | 130.8(4) |
| C(20)-C(21)-C(34)  | 106.3(4) |
| C(20)-C(21)-H(21)  | 126.8    |
| C(34)-C(21)-H(21)  | 126.8    |
| N(2)-C(22)-C(30)   | 120.8(4) |
| N(2)-C(22)-H(22)   | 119.6    |
| C(30)-C(22)-H(22)  | 119.6    |
| N(6)-C(23)-C(42)   | 111.9(4) |
| N(6)-C(23)-H(23)   | 124.0    |
| C(42)-C(23)-H(23)  | 124.0    |
| N(9)-C(24)-C(12)   | 124.2(4) |
| N(9)-C(24)-H(24)   | 117.9    |
| C(12)-C(24)-H(24)  | 117.9    |
| N(2)-C(25)-C(10)   | 109.4(3) |
| N(2)-C(25)-H(25A)  | 109.8    |
| C(10)-C(25)-H(25A) | 109.8    |

|                     |          |
|---------------------|----------|
| N(2)-C(25)-H(25B)   | 109.8    |
| C(10)-C(25)-H(25B)  | 109.8    |
| H(25A)-C(25)-H(25B) | 108.2    |
| C(31)-C(26)-C(43)   | 118.4(4) |
| C(31)-C(26)-H(26)   | 120.8    |
| C(43)-C(26)-H(26)   | 120.8    |
| N(4)-C(27)-C(41)    | 121.3(4) |
| N(4)-C(27)-C(32)    | 118.8(4) |
| C(41)-C(27)-C(32)   | 119.9(4) |
| N(1)-C(28)-C(18)    | 121.9(4) |
| N(1)-C(28)-C(10)    | 117.4(4) |
| C(18)-C(28)-C(10)   | 120.7(3) |
| N(5)-C(29)-C(19)    | 120.1(4) |
| N(5)-C(29)-H(29)    | 120.0    |
| C(19)-C(29)-H(29)   | 120.0    |
| N(3)-C(30)-C(36)    | 110.5(4) |
| N(3)-C(30)-C(22)    | 118.1(4) |
| C(36)-C(30)-C(22)   | 131.4(4) |
| N(1)-C(31)-C(26)    | 124.0(4) |
| N(1)-C(31)-H(31)    | 118.0    |
| C(26)-C(31)-H(31)   | 118.0    |
| C(27)-C(32)-C(33)   | 115.6(4) |

|                     |          |
|---------------------|----------|
| C(27)-C(32)-H(32A)  | 108.4    |
| C(33)-C(32)-H(32A)  | 108.4    |
| C(27)-C(32)-H(32B)  | 108.4    |
| C(33)-C(32)-H(32B)  | 108.4    |
| H(32A)-C(32)-H(32B) | 107.5    |
| N(5)-C(33)-C(32)    | 110.3(3) |
| N(5)-C(33)-H(33A)   | 109.6    |
| C(32)-C(33)-H(33A)  | 109.6    |
| N(5)-C(33)-H(33B)   | 109.6    |
| C(32)-C(33)-H(33B)  | 109.6    |
| H(33A)-C(33)-H(33B) | 108.1    |
| C(21)-C(34)-C(17)   | 105.9(4) |
| C(21)-C(34)-H(34)   | 127.0    |
| C(17)-C(34)-H(34)   | 127.0    |
| N(4)-C(35)-C(37)    | 124.3(4) |
| N(4)-C(35)-H(35)    | 117.9    |
| C(37)-C(35)-H(35)   | 117.9    |
| C(39)-C(36)-C(30)   | 107.1(4) |
| C(39)-C(36)-H(36)   | 126.5    |
| C(30)-C(36)-H(36)   | 126.5    |
| C(35)-C(37)-C(45)   | 118.3(5) |
| C(35)-C(37)-H(37)   | 120.9    |

|                   |          |
|-------------------|----------|
| C(45)-C(37)-H(37) | 120.9    |
| C(15)-C(38)-C(12) | 118.3(4) |
| C(15)-C(38)-H(38) | 120.9    |
| C(12)-C(38)-H(38) | 120.9    |
| C(36)-C(39)-C(40) | 105.6(4) |
| C(36)-C(39)-H(39) | 127.2    |
| C(40)-C(39)-H(39) | 127.2    |
| N(3)-C(40)-C(39)  | 112.1(4) |
| N(3)-C(40)-H(40)  | 124.0    |
| C(39)-C(40)-H(40) | 124.0    |
| C(45)-C(41)-C(27) | 120.7(4) |
| C(45)-C(41)-H(41) | 119.6    |
| C(27)-C(41)-H(41) | 119.6    |
| C(44)-C(42)-C(23) | 105.6(4) |
| C(44)-C(42)-H(42) | 127.2    |
| C(23)-C(42)-H(42) | 127.2    |
| C(26)-C(43)-C(18) | 119.1(4) |
| C(26)-C(43)-H(43) | 120.4    |
| C(18)-C(43)-H(43) | 120.4    |
| C(19)-C(44)-C(42) | 106.7(4) |
| C(19)-C(44)-H(44) | 126.7    |
| C(42)-C(44)-H(44) | 126.7    |

|                   |          |
|-------------------|----------|
| C(41)-C(45)-C(37) | 118.4(4) |
| C(41)-C(45)-H(45) | 120.8    |
| C(37)-C(45)-H(45) | 120.8    |

---

### 2.3 Bond angles and distances for complex **3**

---

|             |          |
|-------------|----------|
| Mg(1)-O(1)  | 2.121(3) |
| Mg(1)-N(3)  | 2.125(3) |
| Mg(1)-O(2)  | 2.141(3) |
| Mg(1)-N(1)  | 2.144(3) |
| Mg(1)-N(4)  | 2.257(3) |
| Mg(1)-N(2)  | 2.261(3) |
| N(2)-C(5)   | 1.301(4) |
| N(2)-C(6)   | 1.426(4) |
| N(4)-C(16)  | 1.302(4) |
| N(4)-C(17)  | 1.423(4) |
| O(2)-C(27)  | 1.418(5) |
| O(2)-C(30)  | 1.426(5) |
| N(1)-C(4)   | 1.340(4) |
| N(1)-C(1)   | 1.375(4) |
| O(1)-C(23)  | 1.441(4) |
| O(1)-C(26)  | 1.443(5) |
| N(3)-C(15)  | 1.337(4) |
| N(3)-C(12)  | 1.380(4) |
| C(5)-C(1)   | 1.413(5) |
| C(12)-C(16) | 1.399(5) |
| C(12)-C(13) | 1.410(5) |
| C(6)-C(11)  | 1.388(5) |
| C(6)-C(7)   | 1.389(5) |
| C(1)-C(2)   | 1.393(5) |
| C(17)-C(18) | 1.390(5) |
| C(17)-C(22) | 1.393(5) |
| C(2)-C(3)   | 1.373(5) |
| C(15)-C(14) | 1.388(5) |
| C(11)-C(10) | 1.380(5) |
| C(18)-C(19) | 1.388(5) |
| C(4)-C(3)   | 1.391(5) |
| C(9)-C(10)  | 1.373(5) |

|                  |            |
|------------------|------------|
| C(9)-C(8)        | 1.386(5)   |
| C(8)-C(7)        | 1.379(5)   |
| C(20)-C(21)      | 1.359(6)   |
| C(20)-C(19)      | 1.381(6)   |
| C(14)-C(13)      | 1.373(5)   |
| C(22)-C(21)      | 1.394(6)   |
| C(26)-C(25)      | 1.455(6)   |
| C(30)-C(29)      | 1.468(6)   |
| C(23)-C(24)      | 1.492(7)   |
| C(29)-C(28)      | 1.476(7)   |
| C(27)-C(28)      | 1.465(6)   |
| C(24)-C(25)      | 1.432(7)   |
| O(1)-Mg(1)-N(3)  | 90.74(11)  |
| O(1)-Mg(1)-O(2)  | 177.82(12) |
| N(3)-Mg(1)-O(2)  | 89.06(11)  |
| O(1)-Mg(1)-N(1)  | 92.82(11)  |
| N(3)-Mg(1)-N(1)  | 175.95(12) |
| O(2)-Mg(1)-N(1)  | 87.46(11)  |
| O(1)-Mg(1)-N(4)  | 89.02(11)  |
| N(3)-Mg(1)-N(4)  | 78.67(11)  |
| O(2)-Mg(1)-N(4)  | 88.81(11)  |
| N(1)-Mg(1)-N(4)  | 103.31(11) |
| O(1)-Mg(1)-N(2)  | 90.76(11)  |
| N(3)-Mg(1)-N(2)  | 99.53(12)  |
| O(2)-Mg(1)-N(2)  | 91.41(11)  |
| N(1)-Mg(1)-N(2)  | 78.49(11)  |
| N(4)-Mg(1)-N(2)  | 178.19(11) |
| C(5)-N(2)-C(6)   | 117.0(3)   |
| C(5)-N(2)-Mg(1)  | 108.5(2)   |
| C(6)-N(2)-Mg(1)  | 134.1(2)   |
| C(16)-N(4)-C(17) | 117.5(3)   |
| C(16)-N(4)-Mg(1) | 108.5(2)   |
| C(17)-N(4)-Mg(1) | 134.0(2)   |
| C(27)-O(2)-C(30) | 109.5(3)   |
| C(27)-O(2)-Mg(1) | 123.2(2)   |
| C(30)-O(2)-Mg(1) | 126.8(2)   |
| C(4)-N(1)-C(1)   | 104.9(3)   |
| C(4)-N(1)-Mg(1)  | 144.4(3)   |
| C(1)-N(1)-Mg(1)  | 110.4(2)   |
| C(23)-O(1)-C(26) | 109.1(3)   |
| C(23)-O(1)-Mg(1) | 125.9(2)   |
| C(26)-O(1)-Mg(1) | 124.7(2)   |
| C(15)-N(3)-C(12) | 105.7(3)   |

|                   |          |
|-------------------|----------|
| C(15)-N(3)-Mg(1)  | 142.9(3) |
| C(12)-N(3)-Mg(1)  | 110.8(2) |
| N(2)-C(5)-C(1)    | 121.6(3) |
| N(3)-C(12)-C(16)  | 120.0(3) |
| N(3)-C(12)-C(13)  | 109.4(3) |
| C(16)-C(12)-C(13) | 130.5(3) |
| C(11)-C(6)-C(7)   | 118.7(3) |
| C(11)-C(6)-N(2)   | 119.6(3) |
| C(7)-C(6)-N(2)    | 121.7(3) |
| N(1)-C(1)-C(2)    | 110.7(3) |
| N(1)-C(1)-C(5)    | 120.2(3) |
| C(2)-C(1)-C(5)    | 129.1(3) |
| C(18)-C(17)-C(22) | 119.3(3) |
| C(18)-C(17)-N(4)  | 118.8(3) |
| C(22)-C(17)-N(4)  | 121.9(3) |
| N(4)-C(16)-C(12)  | 121.9(3) |
| C(3)-C(2)-C(1)    | 106.3(3) |
| N(3)-C(15)-C(14)  | 112.0(4) |
| C(10)-C(11)-C(6)  | 120.9(3) |
| C(19)-C(18)-C(17) | 120.2(4) |
| N(1)-C(4)-C(3)    | 111.9(3) |
| C(10)-C(9)-C(8)   | 120.1(3) |
| C(7)-C(8)-C(9)    | 119.9(4) |
| C(8)-C(7)-C(6)    | 120.5(3) |
| C(9)-C(10)-C(11)  | 119.8(3) |
| C(21)-C(20)-C(19) | 120.1(4) |
| C(13)-C(14)-C(15) | 106.4(3) |
| C(20)-C(19)-C(18) | 120.0(4) |
| C(2)-C(3)-C(4)    | 106.3(3) |
| C(17)-C(22)-C(21) | 119.3(4) |
| C(20)-C(21)-C(22) | 121.1(4) |
| O(1)-C(26)-C(25)  | 106.3(4) |
| C(14)-C(13)-C(12) | 106.5(3) |
| O(2)-C(30)-C(29)  | 106.8(3) |
| O(1)-C(23)-C(24)  | 105.9(4) |
| C(30)-C(29)-C(28) | 105.4(4) |
| O(2)-C(27)-C(28)  | 106.8(4) |
| C(25)-C(24)-C(23) | 105.9(4) |
| C(27)-C(28)-C(29) | 104.5(4) |
| C(24)-C(25)-C(26) | 107.2(4) |

---

## 2.4 Bond angles and distances for complex 4

---

|            |            |
|------------|------------|
| Mg(1)-N(1) | 2.1393(15) |
| Mg(1)-O(1) | 2.1406(16) |
| Mg(1)-O(2) | 2.1455(15) |
| Mg(1)-N(3) | 2.1480(15) |
| Mg(1)-N(2) | 2.1938(17) |
| Mg(1)-N(4) | 2.2124(16) |
| N(4)-C(17) | 1.284(2)   |
| N(4)-C(18) | 1.469(2)   |
| N(2)-C(5)  | 1.284(2)   |
| N(2)-C(6)  | 1.463(2)   |
| N(1)-C(1)  | 1.354(2)   |
| N(1)-C(4)  | 1.378(2)   |
| O(2)-C(29) | 1.424(3)   |
| O(2)-C(32) | 1.435(2)   |
| N(3)-C(13) | 1.351(2)   |
| N(3)-C(16) | 1.378(2)   |
| O(1)-C(25) | 1.411(3)   |
| O(1)-C(28) | 1.426(3)   |
| C(7)-C(12) | 1.384(2)   |
| C(7)-C(8)  | 1.386(2)   |
| C(7)-C(6)  | 1.512(2)   |



|             |          |
|-------------|----------|
| C(19)-C(24) | 1.385(3) |
| C(19)-C(20) | 1.385(3) |
| C(19)-C(18) | 1.507(3) |
| C(17)-C(16) | 1.432(2) |
| C(4)-C(3)   | 1.394(2) |
| C(4)-C(5)   | 1.431(3) |
| C(13)-C(14) | 1.388(3) |
| C(16)-C(15) | 1.394(2) |
| C(15)-C(14) | 1.388(3) |
| C(12)-C(11) | 1.386(3) |
| C(8)-C(9)   | 1.389(3) |
| C(3)-C(2)   | 1.387(3) |
| C(1)-C(2)   | 1.389(3) |
| C(24)-C(23) | 1.382(3) |
| C(9)-C(10)  | 1.377(3) |
| C(32)-C(31) | 1.502(3) |
| C(10)-C(11) | 1.374(3) |
| C(20)-C(21) | 1.380(3) |
| C(23)-C(22) | 1.375(4) |
| C(21)-C(22) | 1.380(3) |
| C(25)-C(26) | 1.462(4) |
| C(29)-C(30) | 1.391(5) |

|                  |            |
|------------------|------------|
| C(26)-C(27)      | 1.456(5)   |
| C(28)-C(27)      | 1.445(5)   |
| C(30)-C(31)      | 1.463(5)   |
| N(1)-Mg(1)-O(1)  | 94.63(6)   |
| N(1)-Mg(1)-O(2)  | 93.07(6)   |
| O(1)-Mg(1)-O(2)  | 85.23(7)   |
| N(1)-Mg(1)-N(3)  | 169.32(6)  |
| O(1)-Mg(1)-N(3)  | 92.66(7)   |
| O(2)-Mg(1)-N(3)  | 95.30(6)   |
| N(1)-Mg(1)-N(2)  | 78.65(6)   |
| O(1)-Mg(1)-N(2)  | 173.25(6)  |
| O(2)-Mg(1)-N(2)  | 94.34(6)   |
| N(3)-Mg(1)-N(2)  | 94.09(6)   |
| N(1)-Mg(1)-N(4)  | 92.95(6)   |
| O(1)-Mg(1)-N(4)  | 94.17(6)   |
| O(2)-Mg(1)-N(4)  | 173.98(6)  |
| N(3)-Mg(1)-N(4)  | 78.74(6)   |
| N(2)-Mg(1)-N(4)  | 86.95(6)   |
| C(17)-N(4)-C(18) | 117.81(15) |
| C(17)-N(4)-Mg(1) | 110.52(11) |
| C(18)-N(4)-Mg(1) | 130.62(11) |

|                   |            |
|-------------------|------------|
| C(5)-N(2)-C(6)    | 118.70(15) |
| C(5)-N(2)-Mg(1)   | 110.80(12) |
| C(6)-N(2)-Mg(1)   | 129.49(11) |
| C(1)-N(1)-C(4)    | 104.80(15) |
| C(1)-N(1)-Mg(1)   | 144.26(13) |
| C(4)-N(1)-Mg(1)   | 110.22(11) |
| C(29)-O(2)-C(32)  | 106.87(17) |
| C(29)-O(2)-Mg(1)  | 123.01(14) |
| C(32)-O(2)-Mg(1)  | 130.10(12) |
| C(13)-N(3)-C(16)  | 104.73(14) |
| C(13)-N(3)-Mg(1)  | 144.75(13) |
| C(16)-N(3)-Mg(1)  | 110.32(10) |
| C(25)-O(1)-C(28)  | 106.89(18) |
| C(25)-O(1)-Mg(1)  | 128.31(12) |
| C(28)-O(1)-Mg(1)  | 123.32(14) |
| C(12)-C(7)-C(8)   | 118.35(17) |
| C(12)-C(7)-C(6)   | 120.86(16) |
| C(8)-C(7)-C(6)    | 120.76(15) |
| C(24)-C(19)-C(20) | 118.34(19) |
| C(24)-C(19)-C(18) | 121.42(17) |
| C(20)-C(19)-C(18) | 120.22(17) |
| N(4)-C(17)-C(16)  | 120.97(16) |

|                   |            |
|-------------------|------------|
| N(2)-C(6)-C(7)    | 112.16(14) |
| N(1)-C(4)-C(3)    | 110.91(17) |
| N(1)-C(4)-C(5)    | 118.70(15) |
| C(3)-C(4)-C(5)    | 130.38(17) |
| N(2)-C(5)-C(4)    | 120.50(16) |
| N(4)-C(18)-C(19)  | 112.42(15) |
| N(3)-C(13)-C(14)  | 112.04(16) |
| N(3)-C(16)-C(15)  | 110.94(15) |
| N(3)-C(16)-C(17)  | 119.09(14) |
| C(15)-C(16)-C(17) | 129.89(17) |
| C(14)-C(15)-C(16) | 106.09(16) |
| C(7)-C(12)-C(11)  | 120.93(19) |
| C(7)-C(8)-C(9)    | 120.76(17) |
| C(2)-C(3)-C(4)    | 106.18(18) |
| C(15)-C(14)-C(13) | 106.20(15) |
| N(1)-C(1)-C(2)    | 111.84(18) |
| C(23)-C(24)-C(19) | 120.8(2)   |
| C(10)-C(9)-C(8)   | 120.05(19) |
| O(2)-C(32)-C(31)  | 106.63(19) |
| C(3)-C(2)-C(1)    | 106.27(16) |
| C(11)-C(10)-C(9)  | 119.75(18) |
| C(21)-C(20)-C(19) | 121.1(2)   |

|                   |            |
|-------------------|------------|
| C(10)-C(11)-C(12) | 120.15(19) |
| C(22)-C(23)-C(24) | 120.2(2)   |
| C(20)-C(21)-C(22) | 119.9(2)   |
| C(23)-C(22)-C(21) | 119.7(2)   |
| O(1)-C(25)-C(26)  | 107.5(2)   |
| C(30)-C(29)-O(2)  | 108.6(3)   |
| C(27)-C(26)-C(25) | 106.1(3)   |
| O(1)-C(28)-C(27)  | 105.9(3)   |
| C(29)-C(30)-C(31) | 108.0(3)   |
| C(28)-C(27)-C(26) | 105.6(3)   |
| C(30)-C(31)-C(32) | 104.7(2)   |

---
